# Supplementary material for: Ropivacaine‐Loaded Poloxamer Binary Hydrogels for Prolonged Regional Anesthesia: Structural Aspects, Biocompatibility, and Pharmacological Evaluation
Source: Hindawi journal article supplement (doi:10.1155/2021/7300098), 2021-01-01

**SUPPLEMENTARY MATERIAL – Ropivacaine loaded hydrogels: composition, rheological analysis, in vivo biocompatibility and pharmacological efficacy evaluated by sciatic nerve blockade**

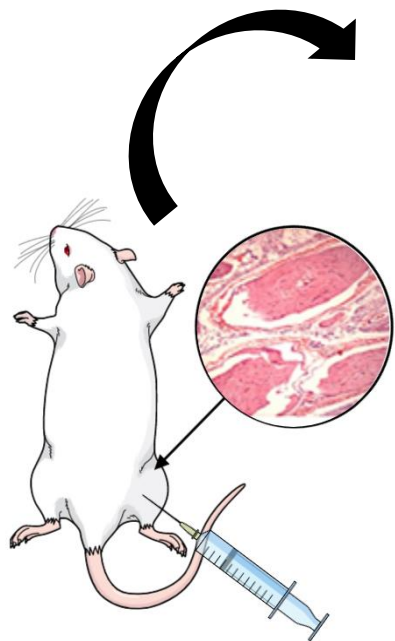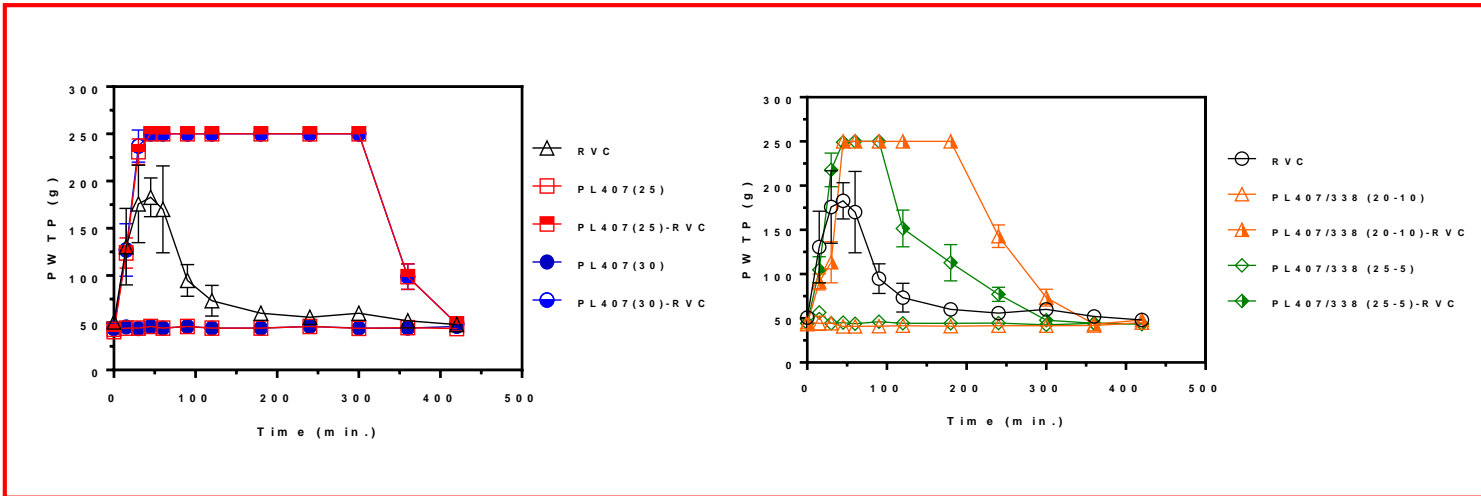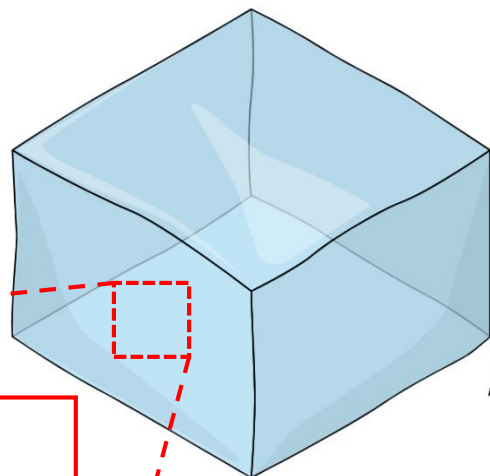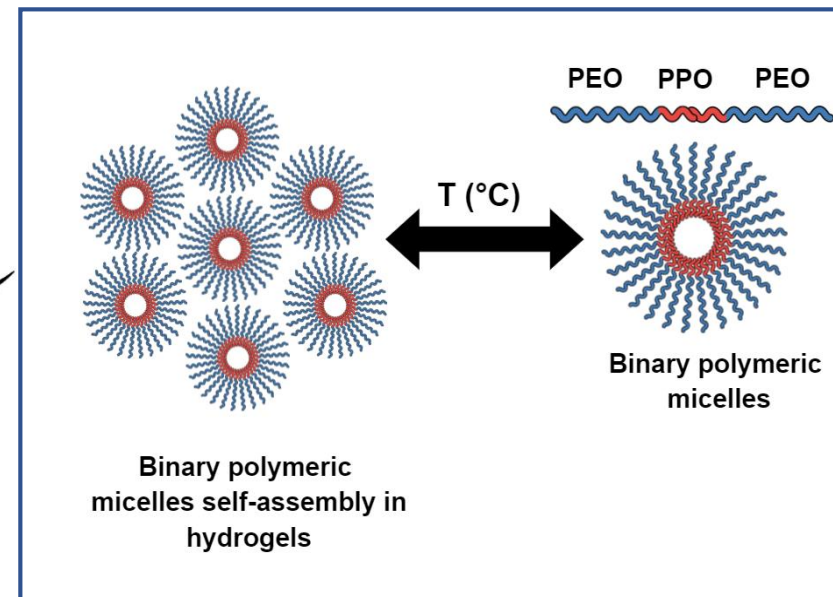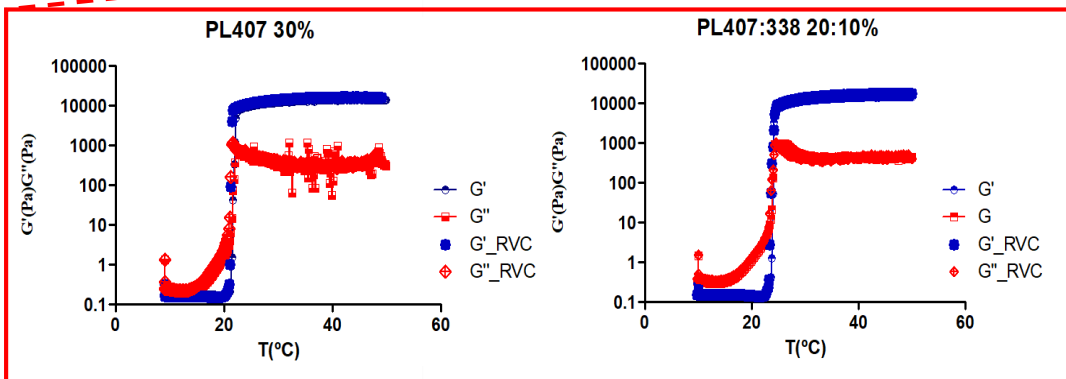

Supplement: f1 [file 7300098.f1.pdf]
